# Supplementary material for: A photoactivatable drug–caged fluorophore conjugate allows direct quantification of intracellular drug transport
Source: Royal Society of Chemistry journal article supplement (doi:10.1039/c3cc46089d), 2013-01-01
Supplement: c3cc46089d.pdf [file c3cc46089d.pdf]

## Supporting Information for

# Photoactivatable Drug-Caged Fluorophore Conjugate Allows Direct Quantification of Intracellular Drug Transport

Sarit S. Agasti,<sup>a,†</sup> Ashley M. Laughney,<sup>a,†</sup> Rainer H. Kohler,<sup>a</sup> and Ralph Weissleder<sup>a,b,\*</sup>

<sup>a</sup>Center for Systems Biology, Massachusetts General Hospital/Harvard Medical School, 185 Cambridge St., Boston, MA 02114 (USA)

<sup>b</sup>Department of Systems Biology, Harvard Medical School, 200 Longwood Ave., Alpert 536, Boston, MA 02115 (USA)

<sup>†</sup> These authors contributed equally to this work

\*e-mail: [rweissleder@mgh.harvard.edu](mailto:rweissleder@mgh.harvard.edu)

### Reagents and instruments:

Unless otherwise stated, all the reagents for the synthesis of drug conjugates were obtained from Sigma-Aldrich (St. Louis, Missouri, USA) and used as received. <sup>1</sup>H NMR spectra were recorded using a Varian 400 MHz spectrometer. High performance liquid chromatography–mass spectrometry (HPLC-MS) analysis was performed using a Waters (Milford, MA) LC-MS system. A Waters XTerra C18 5 μm column was used for HPLC-MS analysis (eluent: 0.1% trifluoroacetic acid (v/v) in water and acetonitrile). Fluorescence spectra were recorded in a TECAN microplate reader. High-resolution electrospray ionization (ESI) mass spectra were recorded using a Bruker Daltonics APEXIV 4.7 Tesla Fourier Transform mass spectrometer (FT-ICR-MS) in the Department of Chemistry Instrumentation Facility at the Massachusetts Institute of Technology.

### Synthesis of PARPi-BODIPYc:

The Carboxyl functionalized Caged BODIPY was synthesized by following a literature procedure.<sup>1</sup> PARPi was synthesized according to a previously described procedure.<sup>2,3</sup> Carboxyl functionalized Caged BODIPY (2.8 mg, 4.96 μmol) and PARPi (1.8 mg, 4.96 μmol) were dissolved in dry DMF (500 μl). To this solution O-(Benzotriazol-1-yl)-N,N,N',N'-

tetramethyluronium Hexafluorophosphate (HBTU, 3.8 mg, 10.02  $\mu\text{mol}$ ) and triethylamine ( $\text{Et}_3\text{N}$ , 2.07  $\mu\text{l}$ , 14.89  $\mu\text{mol}$ ) were added. The reaction mixture was stirred at room temperature (RT) for ~48 h. The reaction mixture was directly loaded onto a C18 reverse phase column for purification (eluent: 0.1% trifluoroacetic acid (v/v) in water and acetonitrile. gradient: 5% acetonitrile in water to 95% acetonitrile in water, v/v). The product isolated as brown solid. Yield: 2.95 mg, 65%.  $^1\text{H}$  NMR (400 MHz,  $\text{CD}_3\text{OD}$ ): 8.38 (m, 1H), 8.08 (d, 2H,  $J = 8$  Hz), 7.95 (d, 1H,  $J = 7.2$  Hz), 7.84 (m, 2H), 7.72 (t, 1H,  $J = 8.2$  Hz), 7.67 (m, 1H), 7.50 (m, 1H), 7.40 (d, 1H,  $J = 8.4$  Hz), 7.37 (m, 1H), 7.34 (m, 1H), 7.17 (t, 1H,  $J = 8.8$  Hz), 6.10 (s, 2H), 5.50 (s, 2H), 4.39 (s, 2H), 3.80-3.34 (m, 8H), 2.45 (s, 6H), 1.50 (s, 6H). LC-ESI-MS: found  $m/z = 893.38$  [ $\text{M} - \text{F}$ ] $^+$ , 911.35 [ $\text{M} - \text{H}$ ] $^-$ ; calculated  $m/z = 893.30$  [ $\text{M} - \text{F}$ ] $^+$ , 911.29 [ $\text{M} - \text{H}$ ] $^-$ . HRMS: [ $\text{M} - \text{F}$ ] $^+$   $m/z$  calculated 893.3030 for  $\text{C}_{47}\text{H}_{40}\text{BF}_2\text{N}_8\text{O}_8$  found 893.3059.

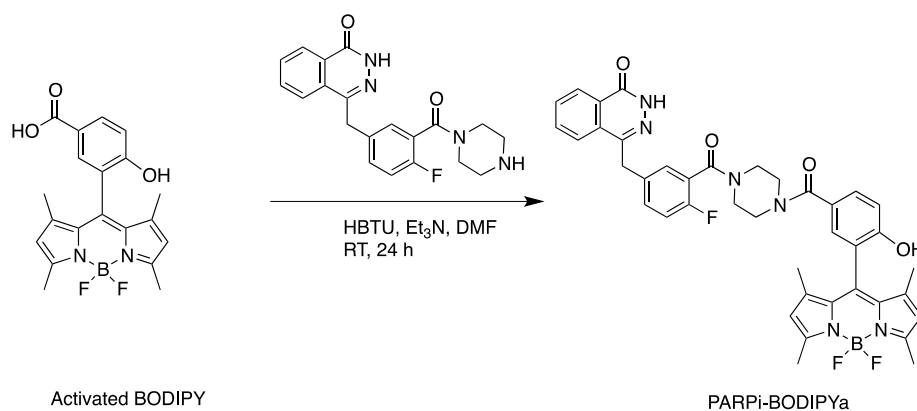

**Scheme S1.** Synthetic scheme for the preparation of PARPi-BODIPYa.

### Synthesis of PARPi-BODIPYa:

The Carboxyl functionalized activated BODIPY was synthesized by following a literature procedure.<sup>1</sup> Carboxyl functionalized activated BODIPY (2.30 mg, 6  $\mu\text{mol}$ ) and PARPi (2.20 mg, 6  $\mu\text{mol}$ ) were dissolved in dry DMF (500  $\mu\text{l}$ ). To this solution O-(Benzotriazol-1-yl)-N,N,N',N'-tetramethyluronium Hexafluorophosphate (HBTU, 4.55 mg, 12  $\mu\text{mol}$ ) and triethylamine ( $\text{Et}_3\text{N}$ , 2.50  $\mu\text{l}$ , 18  $\mu\text{mol}$ ) were added. The reaction mixture was stirred at room temperature (RT) for ~24 h. The reaction mixture was directly loaded onto a C18 reverse phase column for purification (eluent: 0.1% trifluoroacetic acid (v/v) in water and acetonitrile. gradient: 5% acetonitrile in water to 95% acetonitrile in water, v/v). The product isolated as orange solid. Yield: 0.80 mg, 18%.  $^1\text{H}$  NMR (400 MHz,  $\text{CDCl}_3$ ): 10.07 (s, 1H), 8.45 (m, 1H), 7.77 (m, 2H),

7.71 (m, 1H), 7.50 (m, 1H), 7.45 (m, 1H), 7.32 (m, 2H), 7.20 (m, 1H), 7.05 (t, 1H,  $J = 8.6$  Hz), 5.99 (s, 2H), 4.27 (s, 2H), 3.80-3.04 (m, 8H), 2.53 (s, 6H), 1.50 (s, 6H). LC-ESI-MS: found  $m/z = 713.35$   $[M - F]^+$  and  $731.30$   $[M - H]^-$ ; calculated  $m/z = 713.29$   $[M - F]^+$  and  $731.28$   $[M - H]^-$ . HRMS:  $[M-F]^+$   $m/z$  calculated 713.2859 for  $C_{40}H_{36}BF_2N_6O_4$  found 713.2853.

### HPLC-MS characterization of the photocleavage of PARPi-BODIPYc:

A 3.0 mM solution of caged 4-OHC in 1:1 (v/v) water:acetonitrile was used for the HPLC-MS study. The solution of the PARPi-BODIPYc was placed in a glass vial and irradiated at ~365 nm using a hand held UV lamp. Aliquot was taken after 10 min time interval and injected to the HPLC-MS machine for analysis. Prism 5 (GraphPad, La Jolla, CA) for Mac was used to plot the data.

### Fluorescence spectroscopy characterization of the photocleavage of PARPi-BODIPYc:

A 1  $\mu$ M solution of PARPi-BODIPYc in 1:1 (v/v) water:acetonitrile was used for the fluorescence spectroscopic characterization of the photocleavage reaction. The solution of the PARPi-BODIPYc was placed in a 96 well black clear bottom microplate. The solution was then irradiated at ~365 nm using a hand held UV lamp. After light exposure, fluorescence spectra of the solution were recorded in a TECAN microplate reader. Time course of the photocleavage reaction was monitored by exposing the PARPi-BODIPYc solution to light for different durations, and subsequently recording the fluorescence spectra of the solution. Prism 5 (GraphPad, La Jolla, CA) for Mac was used to plot the data.

### PARPi derivatives used for activity assay:

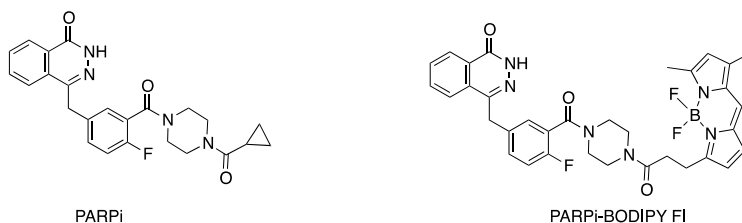

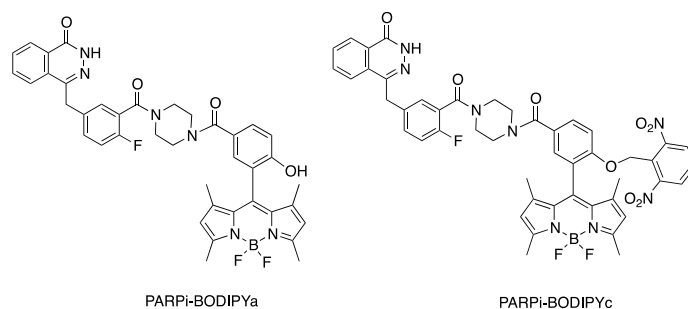

**Supporting figure 1.** Chemical structures of the unlabeled and labeled variants of PARPi used for the activity assay.

### Inhibitory potential and cell viability assays:

The inhibitor potential of the PARPi derivatives was quantified using the commercially available HT Universal Colorimetric PARP Assay Kit (Trevigen, Gaithersburg, MD) in triplicate according to the manufacturers specifications. Two-fold dilutions of PARPi derivatives were incubated with 0.5U of PARP high specific activity (HSA) enzyme for 10 minutes in histone-coated 96-well plates; final concentrations of PARPi derivatives ranged from 10  $\mu$ M to 1 nM and 0 nM PARPi was included in the assay as an activity control. All reaction mixtures were adjusted to a final volume of 50  $\mu$ L and a final concentration of 0.5% dimethyl sulfoxide (DMSO) in assay buffer. PARP-1 activity was measured by absorbance at 450nm in each well using a Tecan Safire2 microplate reader (Tecan Group, Mannedorf, Switzerland). The half maximal inhibitor concentration values and associated 95% confidence intervals were computed in MATLAB by minimizing the sum of squared residuals between the measured absorbance and a three-parameter sigmoidal dose response function. To achieve this, the nonlinear regression function, *nlpredci*, was applied to the normalized and log-transformed absorbance data. Toxicity profiles of the derivatives were assayed using 1X PrestoBlue Cell Viability Reagent (Life Technologies, Catalog #A-13261) after 120 h exposure to the PARPi derivatives; the viability assay was repeated for each derivative in triplicate. The BRCA1-mutant breast cancer cell line, MDA-MB-436, was cultured in RPMI 1640 medium supplemented with 10% Fetal Bovine Serum, L-glutamine, 100 IU penicillin, and 100  $\mu$ g/mL streptomycin at 37°C and 5% CO<sub>2</sub>. Cell viability assays were performed in a 96-well format and 2,000 cells were seeded per well 24 h prior to inhibitor administration. The concentration of inhibitor was serially diluted from 10  $\mu$ M to 1 nM and similarly, half maximal inhibitor concentration values were computed using MATLAB

according to a three-parameter sigmoidal dose response function.

### **Photoactivation and imaging:**

The construction of pTag-H2B-Apple has previously been reported;<sup>3</sup> this vector was transfected in HT1080 cells using the X-tremeGENE HP transfection reagent (Roche, Basel, Switzerland), followed by selection in 500 µg/mL G418. Single clones were screened for H2B-Apple expression by fluorescence microscopy and cells were maintained in minimum essential medium supplemented with 10% fetal bovine serum, 100 IU penicillin, 100 µg/mL streptomycin, 2 mM L-glutamine, nonessential amino acids and 100 µg/mL G418. 300,000 cells were plated per 35mm dish in phenol red-free medium and allowed to attach for 48 h. The cells were incubated at with PARPi-BODIPYc for 1 h at 37°C prior to imaging; no washout steps were necessary. Imaging was performed on a DeltaVision microscope (Applied Precision Instruments, Issaquah, WA) with a 20x objective; pre- and post-activation images were acquired with 4x zoom; and single cells were activated at 10x zoom with just 6 scans from the 405 nm laser at full power. Time-lapse microscopy was performed to trace drug activation and loss in single cells. To validate nuclear localization of BODIPY fluorescence after substrate washout, cells were incubated with PARPi-BODIPYc conjugate for 1h and subsequently, were washed twice with phenol red-free media. Three hours after inhibitor washout, single cells were activated as previously described using the 405 nm laser. Nuclear co-localization was observed by overlaying nuclear Apple fluorescence with BODIPY fluorescence using ImageJ software.

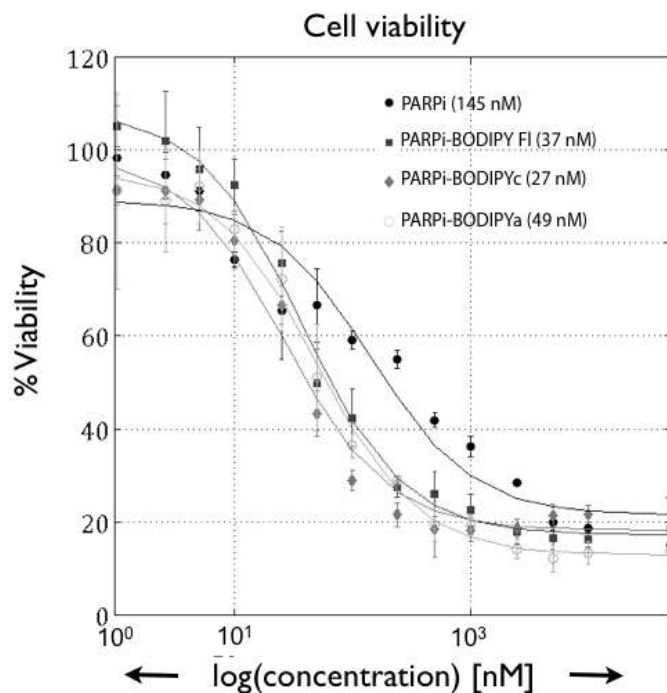

**Supporting figure 2.** Cell viability of MDA-MB-436 cells (breast cancer) after 120 h exposure to unlabeled and labeled variants of PARPi (● PARPi, ■ PARPi-BODIPY Fl, ◆ PARPi-BODIPYc, ○ PARPi-BODIPYa). Corresponding IC<sub>50</sub> values are included in the legend.

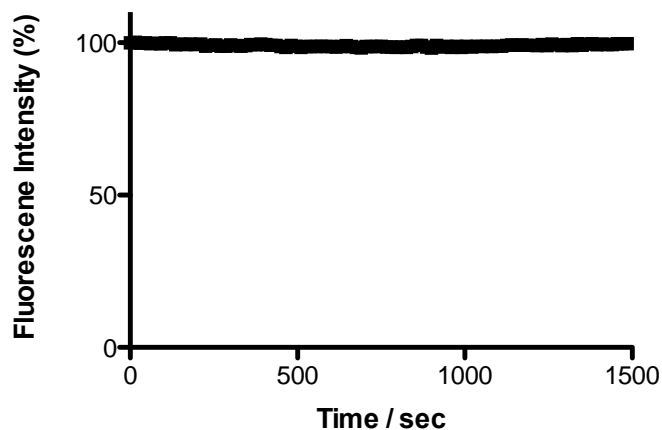

**Supporting figure 3.** Change in fluorescence intensity during repetitive signal acquisition from PARP-BODIPYa. A 1  $\mu$ M solution of PARPi-BODIPYa in 1:1 (v/v) water:acetonitrile was excited at 470 nm for 100 times (every 15 sec interval) and the fluorescence intensity was measured at 519 nm. Fluorescence intensity was normalized against fluorescence at t=0 sec. A minimal decrease in fluorescence was observed over time, indicating good photostability of the fluorescent derivatives.

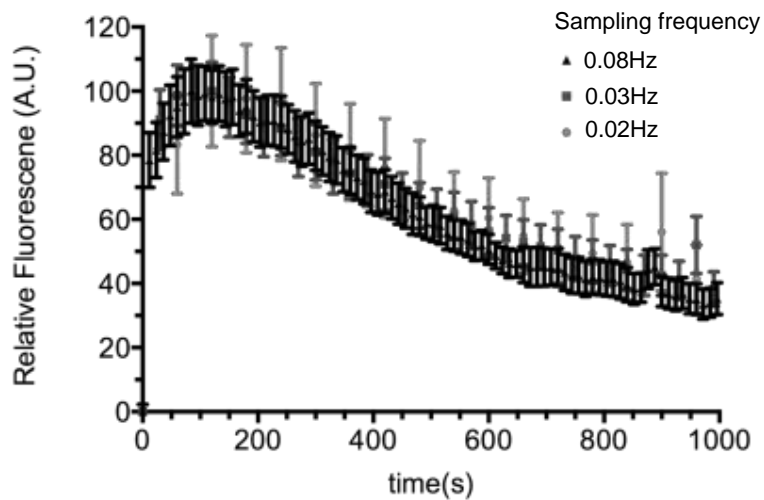

**Supporting figure 4.** Population kinetics of activated drug efflux acquired at three sampling frequencies (reported as the mean  $\pm$  SEM of 9-11 cells per condition). No significant differences were observed between the population efflux slopes ( $p=0.26$ ) for frames sampled every 12, 30 and 60s, indicating negligible photobleaching effects. Relative fluorescence values were computed as a fraction of the maximum signal achieved after photo activation. Single cells were segmented using an active contour algorithm developed in MATLAB.

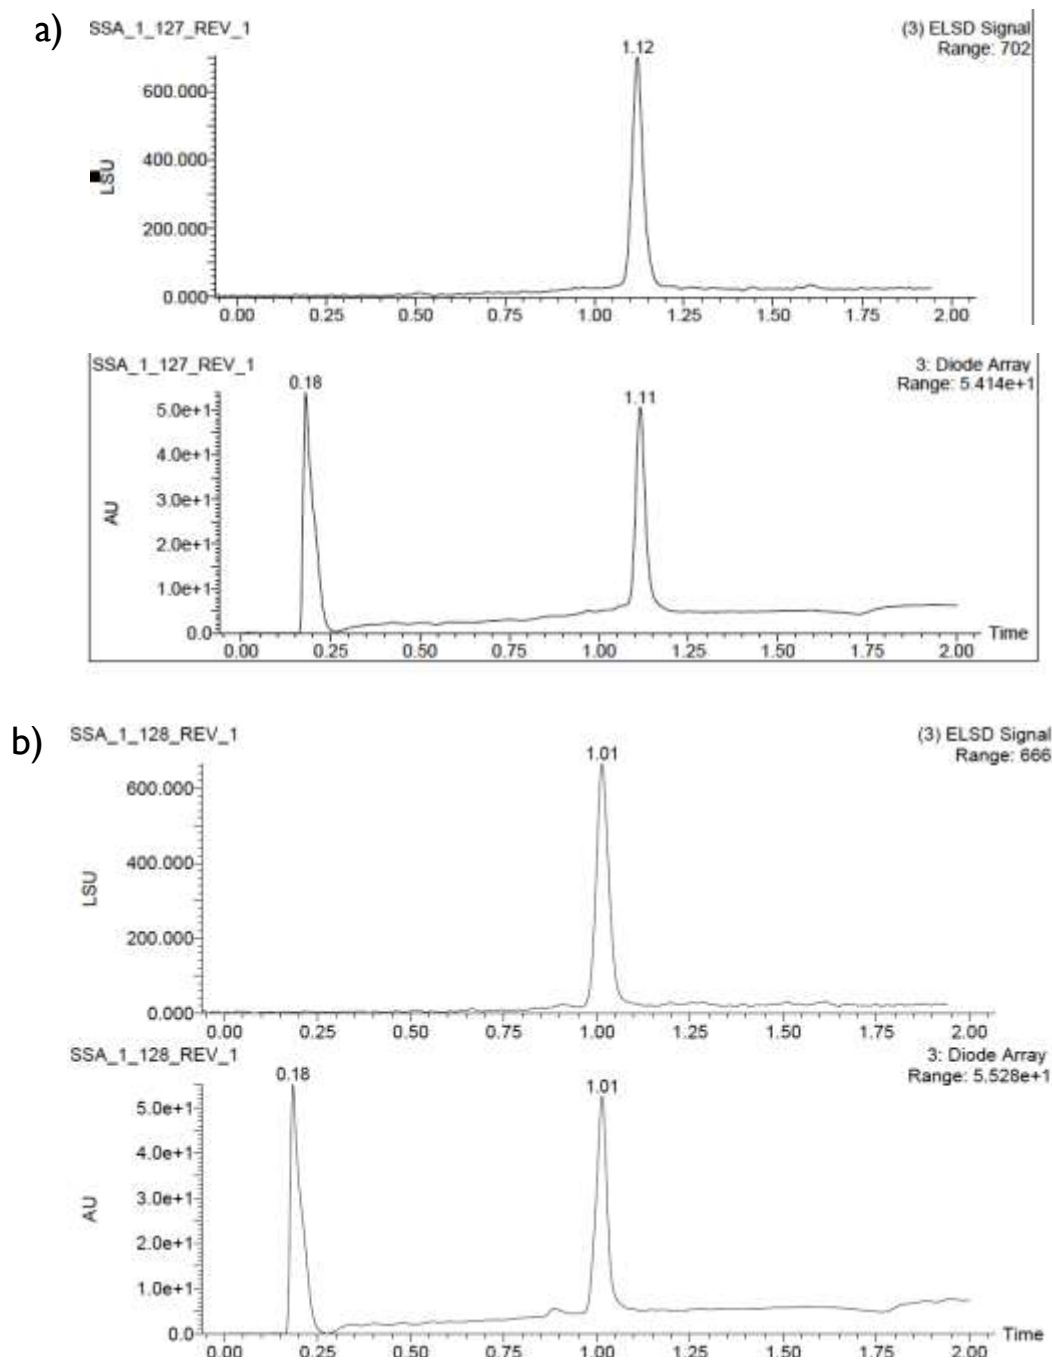

**Supporting figure 5.** HPLC analysis coupled with evaporative light scattering detection (ELSD) and absorbance detection of the a) caged derivative (PARPi-BODIPYc) and b) the fluorescent derivative (PARPi-BODIPYa) of PARPi. A single peak (both in ELSD and absorbance based detection) was observed in the HPLC chromatogram of the respective compound, indicating the high purity of the synthesized compounds.



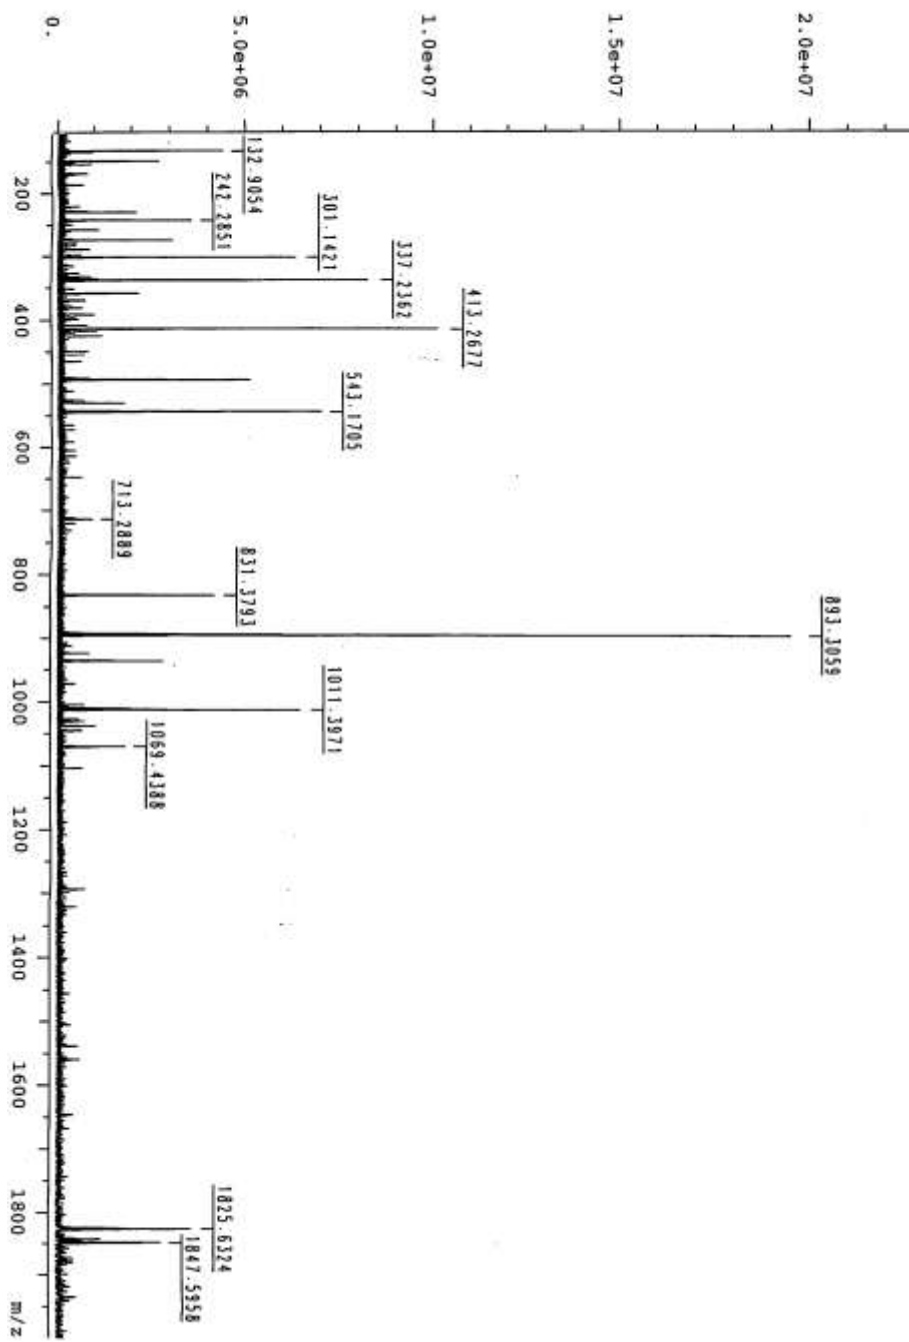

**Figure 6.** HRMS spectra of PARPi-BODIPYc. HRMS:  $[M-F]^+$  m/z calculated 893.3030 for  $C_{47}H_{40}BF_2N_8O_8$  found 893.3059.

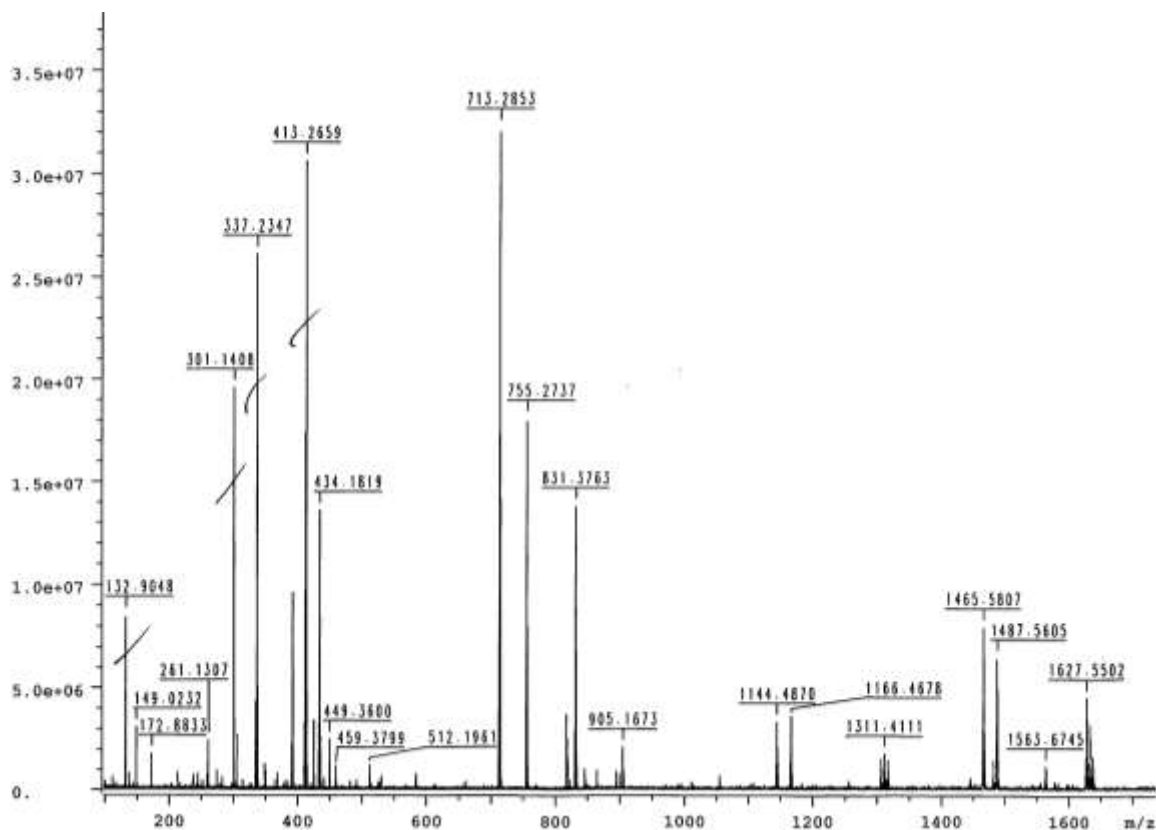

**Figure 7.** HRMS spectra of PARPi-BODIPY. HRMS:  $[M-F]^+$  m/z calculated 713.2859 for  $C_{40}H_{36}BF_2N_6O_4$  found 713.2853.

### Supporting References:

1. T. Kobayashi, T. Komatsu, M. Kamiya, C. Campos, M. Gonzalez-Gaitan, T. Terai, K. Hanaoka, T. Nagano, Y. Urano, *J. Am. Chem. Soc.* 2012, **134**, 11153.
2. K. A. Menear, C. Adcock, R. Boulter, X.-l. Cockcroft, L. Copsy, A. Cranston, K. J. Dillon, J. Drzewiecki, S. Garman, S. Gomez, H. Javaid, F. Kerrigan, C. Knights, A. Lau, V. M. Loh, Jr., I. T. W. Matthews, S. Moore, M. J. O'Connor, G. C. M. Smith, N. M. B. Martin, *J. Med. Chem.* 2008, **51**, 6581.
3. T. Reiner, J. Lacy, E. J. Keliher, K. S. Yang, A. Ullal, R. H. Kohler, C. Vinegoni, R. Weissleder, *Neoplasia* 2012, **14**, 169.
